# Supplementary material for: Geminiviruses encode additional small proteins with specific subcellular localizations and virulence function
Source: PubMed Central journal article supplement (PMC8277811; doi:10.1038/s41467-021-24617-4), 2021-07-13
Supplement: 41467_2021_24617_MOESM1_ESM.pdf [file 41467_2021_24617_MOESM1_ESM.pdf]

## SUPPLEMENTARY INFORMATION

### **Geminiviruses encode additional small proteins with specific subcellular localizations and virulence function**

Pan Gong<sup>1\*</sup>, Huang Tan<sup>2,3\*</sup>, Siwen Zhao<sup>1</sup>, Hao Li<sup>1</sup>, Hui Liu<sup>4</sup>, Yu Ma<sup>2,3</sup>, Xi Zhang<sup>2,3</sup>, Junjie Rong<sup>2,3</sup>, Xing Fu<sup>2</sup>, Rosa Lozano-Durán<sup>2,5#</sup>, Fangfang Li<sup>1#</sup>, Xueping Zhou<sup>1,4#</sup>

<sup>1</sup>State Key Laboratory for Biology of Plant Diseases and Insect Pests, Institute of Plant Protection, Chinese Academy of Agricultural Sciences, Beijing, 100193, China <sup>2</sup>Shanghai Center for Plant Stress Biology, CAS Center for Excellence in Molecular Plant Sciences, Chinese Academy of Sciences, Shanghai 201602, China. <sup>3</sup>University of the Chinese Academy of Sciences, Beijing 100049, China. <sup>4</sup>State Key Laboratory of Rice Biology, Institute of Biotechnology, Zhejiang University, Hangzhou, Zhejiang, 310058, China <sup>5</sup>Department of Plant Biochemistry, Centre for Plant Molecular Biology (ZMBP), Eberhard Karls University, D-72076 Tübingen, Germany.

\*These authors contributed equally to this work.

#Co-corresponding authors: Rosa Lozano-Durán ([rosa.lozano-duran@zmbp.uni-tuebingen.de](mailto:rosa.lozano-duran@zmbp.uni-tuebingen.de); [lozano-duran@psc.ac.cn](mailto:lozano-duran@psc.ac.cn)); Fangfang Li ([lifangfang@caas.cn](mailto:lifangfang@caas.cn)); Xueping Zhou ([zzhou@zju.edu.cn](mailto:zzhou@zju.edu.cn)).

#### **This file contains:**

- **Supplementary Figures 1-12**
- **Supplementary Tables 1-6**

## Supplementary Figures

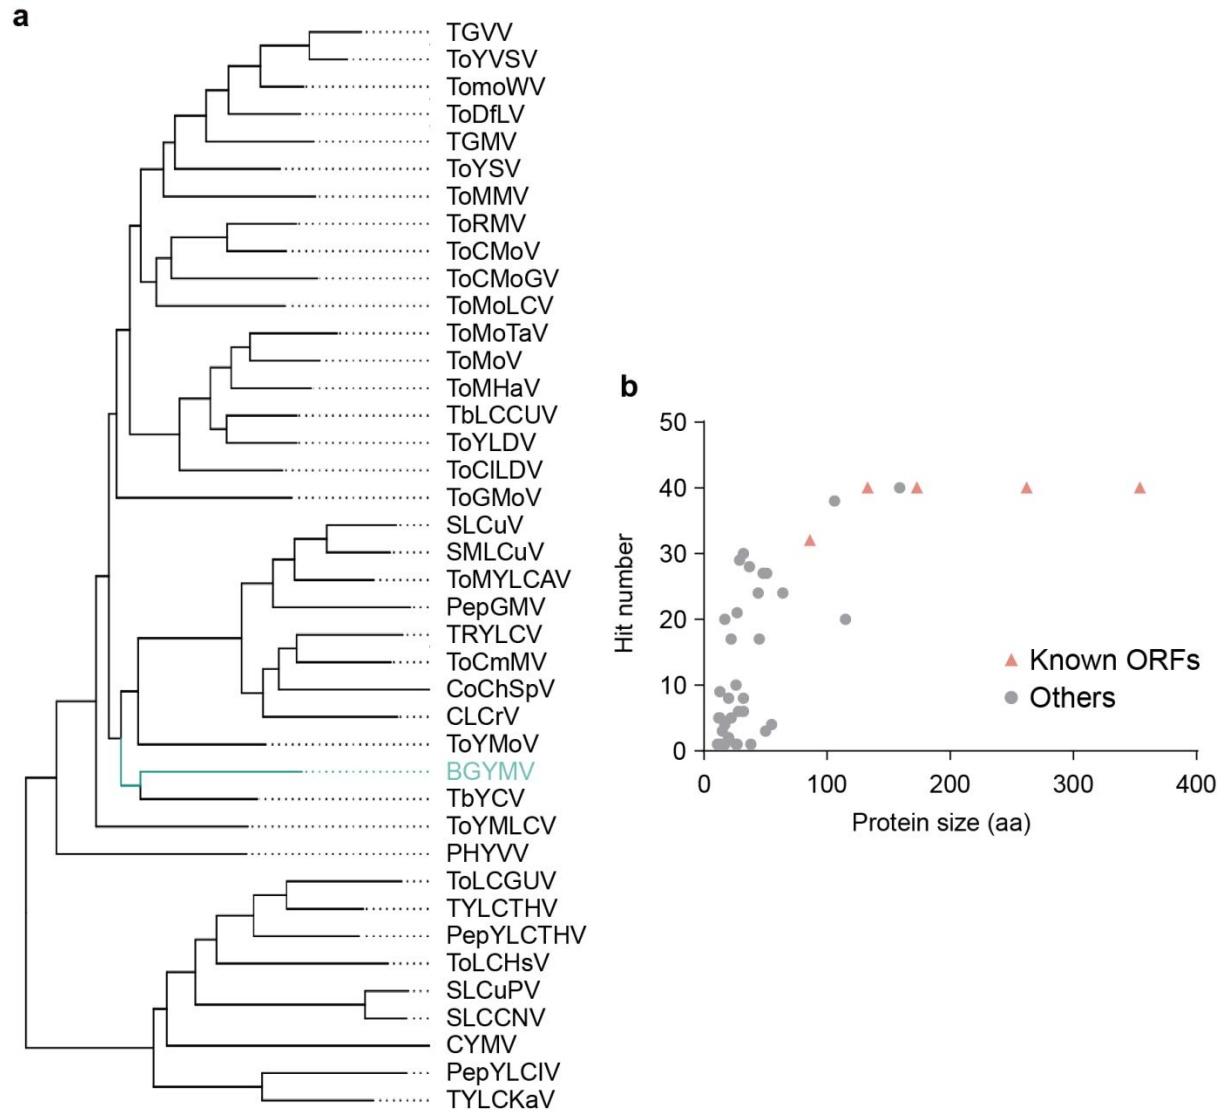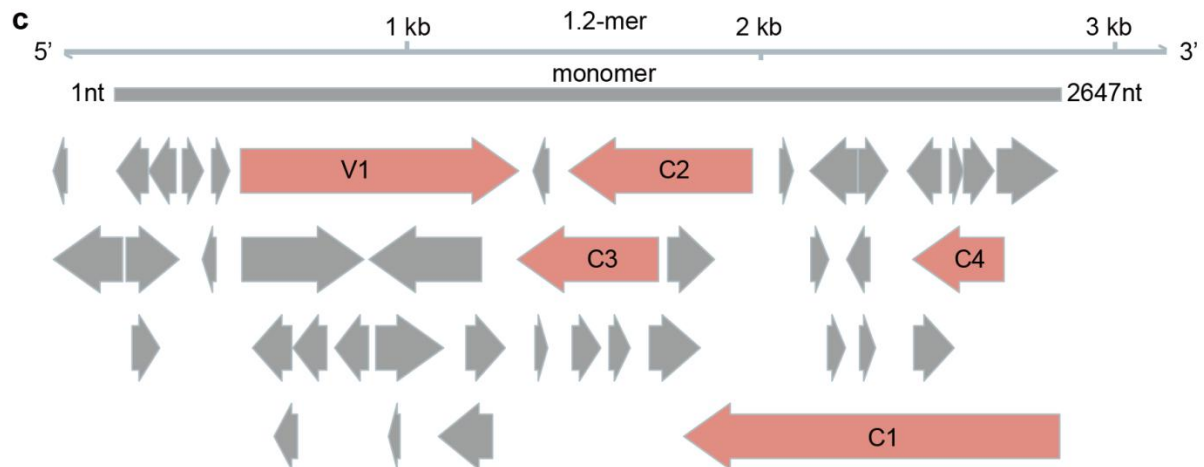

**Supplementary Fig. 1. Prediction of ORFs in the bean golden yellow mosaic virus (BGYMV; gen. *Begomovirus*) genome.** **a.** Phylogenic tree based on the full genomic sequences of selected bipartite begomoviruses; for a full list, see Supplementary Table 2. All sequences were downloaded from GenBank. BGYMV is indicated in blue. **b.** Schematic view of predicted ORFs ( $\geq 30$  nt) in the BGYMV genome. A 1.2-mer was used for ORF prediction (see Methods section). **c.** Correlation between the size of the BGYMV ORFs-encoded proteins and their representation in the selected set of bipartite begomoviruses (**a**). In (**b**) and (**c**), arrows indicate ORFs; the known ORFs (C1, C2, C3, C4, and V1) are indicated in pink.

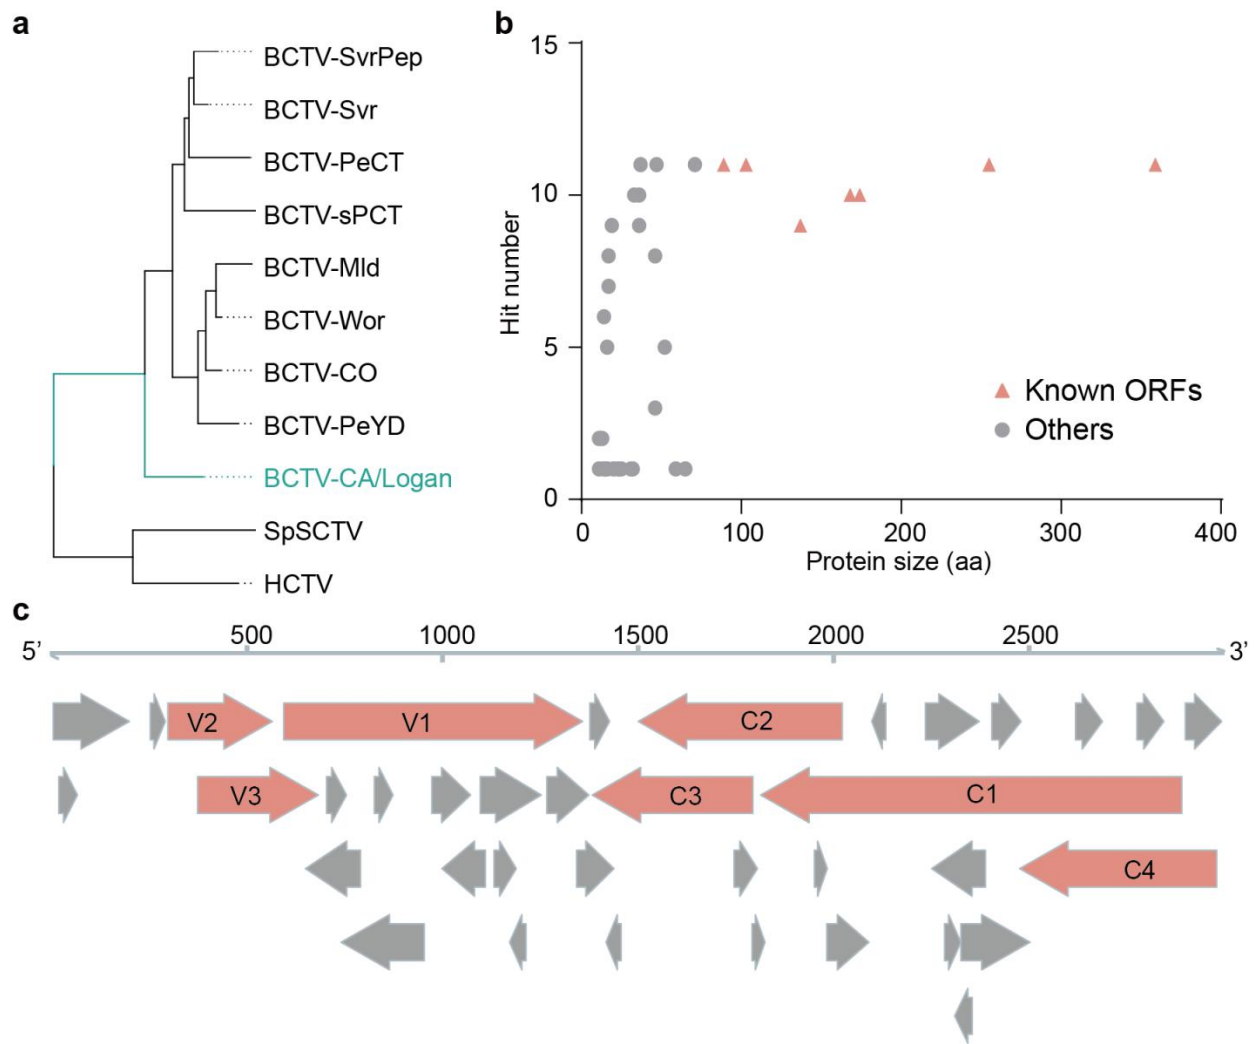

**Supplementary Fig. 2. Prediction of ORFs in the beet curly top virus California/Logan strain (BCTV-AC/Logan; gen. *Curtovirus*) genome.** **a.** Phylogenetic tree based on full genomic sequences of selected curtoviruses; for a full list, see Supplementary Table 3. All sequences were downloaded from GenBank. BCTV-CA/Logan is indicated in blue. **b.** Schematic view of predicted ORFs ( $\geq 30$  nt) in BCTV-CA/Logan genome. **c.** Correlation between the size of the BCTV-CA/Logan ORFs-encoded proteins and their representation in the selected set of curtoviruses (**a**). In (**b**) and (**c**), arrows indicate ORFs; the known ORFs (C1, C2, C3, C4, V1, V2, and V3) are indicated in pink.

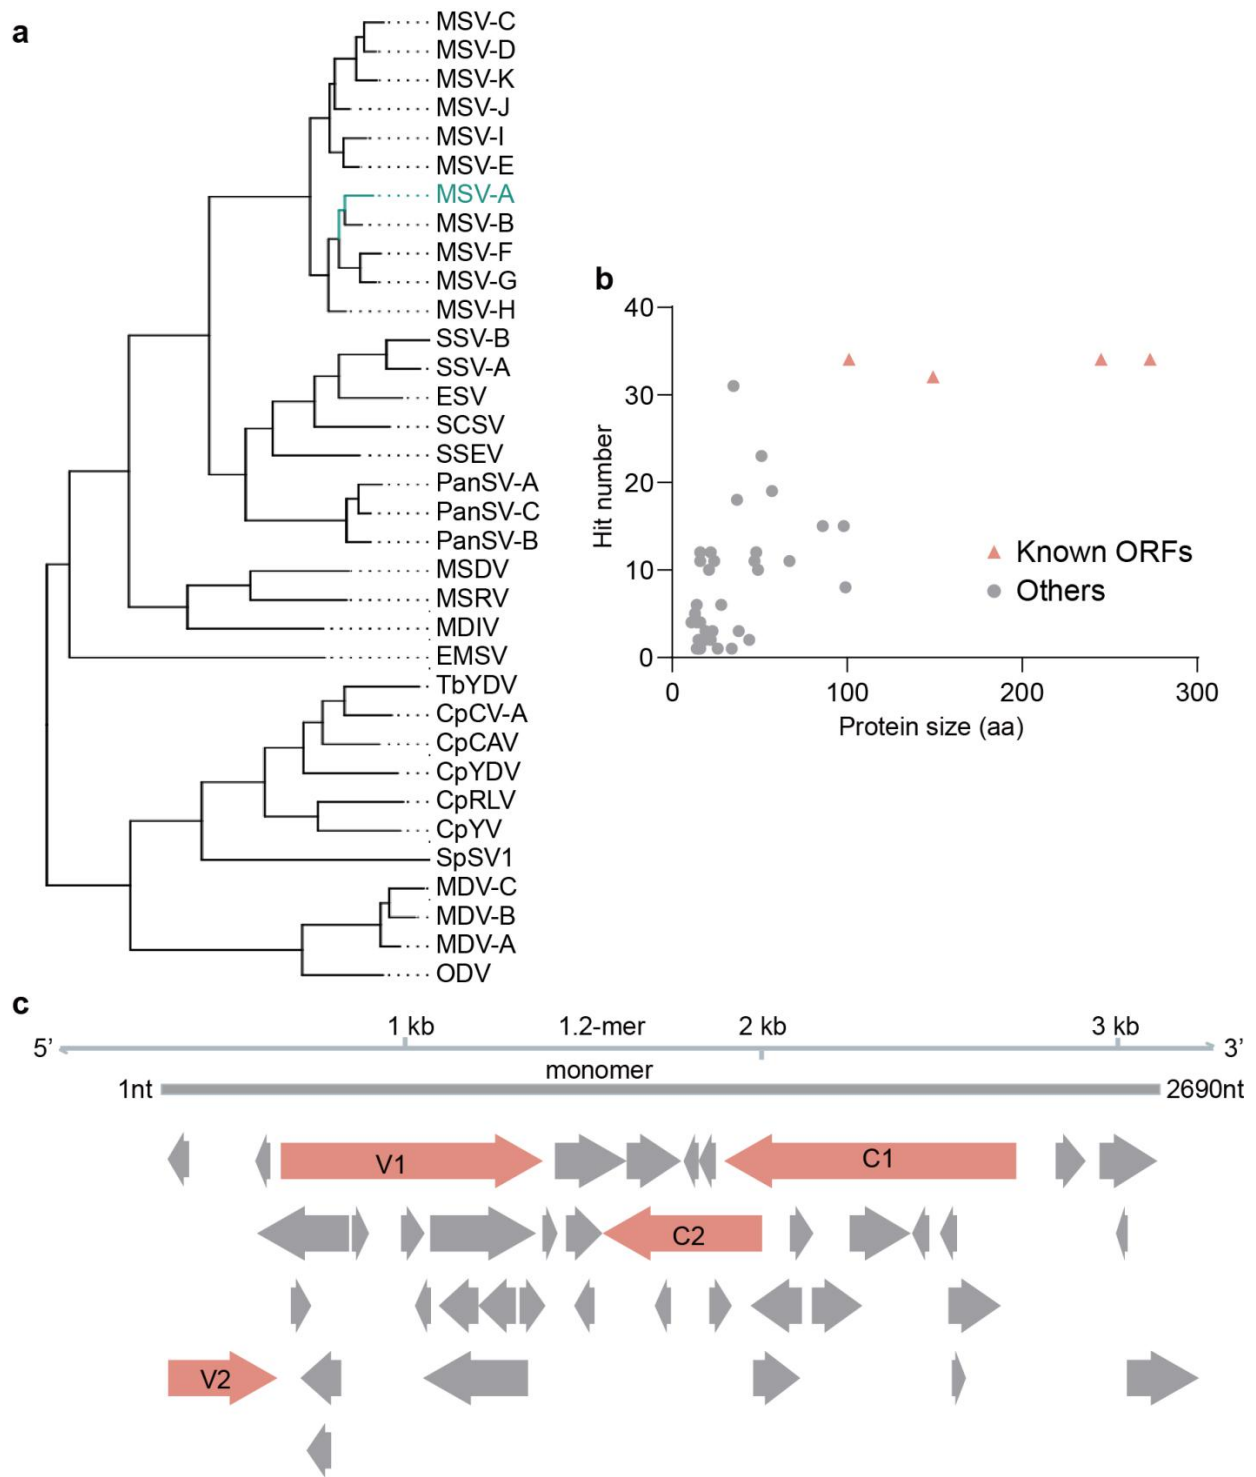

**Supplementary Fig. 3. Prediction of ORFs in the maize streak virus A strain (MSV-A; gen. *Mastrevirus*) genome.** **a.** Phylogenetic tree based on full genomic sequences of selected mastreviruses; for a full list, see Supplementary Table 4. All sequences were downloaded from GenBank. MSV is indicated in blue. **b.** Schematic view of predicted ORFs ( $\geq 30$  nt) in the MSV-A genome. A 1.2-mer was used for ORF prediction (see Methods section). **c.** Correlation

between the size of the MSV-A ORFs-encoded proteins and their representation in the selected set of mastreviruses (a). In (b) and (c), arrows indicate ORFs; the known ORFs (C1, C2, V1, and V2) are indicated in pink.

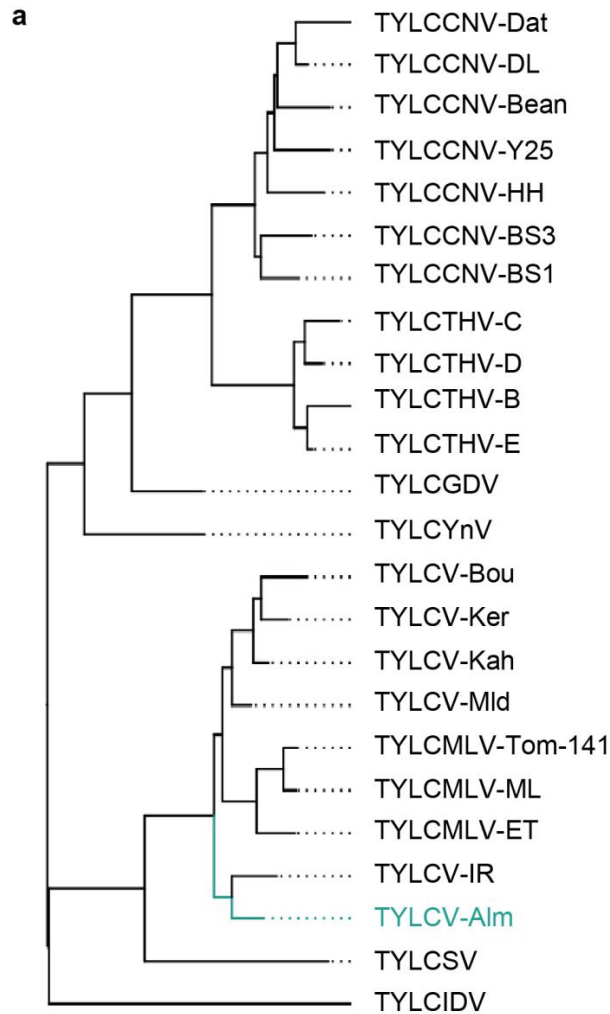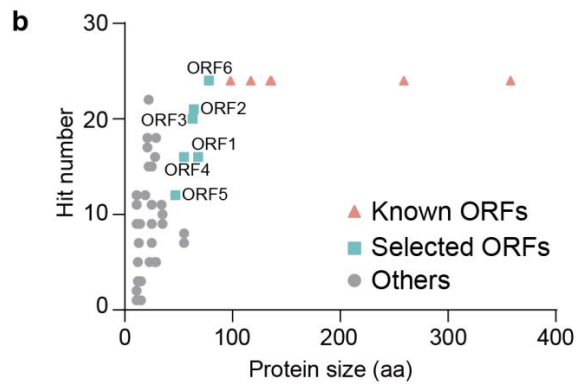

**Supplementary Fig. 4. Prediction of ORFs in the tomato yellow leaf curl virus (TYLCV-Alm; gen. *Begomovirus*) genome. a.** Phylogenetic tree based on full genomic sequences of selected

monopartite tomato-infecting begomoviruses; for a full list, see Supplementary Table 5. All sequences were downloaded from GenBank. TYLCV-Alm is indicated in blue. **b.** Correlation between the size of the TYLCV-Alm ORFs-encoded proteins and their representation in the selected set of monopartite tomato-infecting begomoviruses (**a**). Known ORFs (C1, C2, C3, C4, V1 and V2) are indicated in pink; selected additional ORFs (ORF1-6) are indicated in blue.

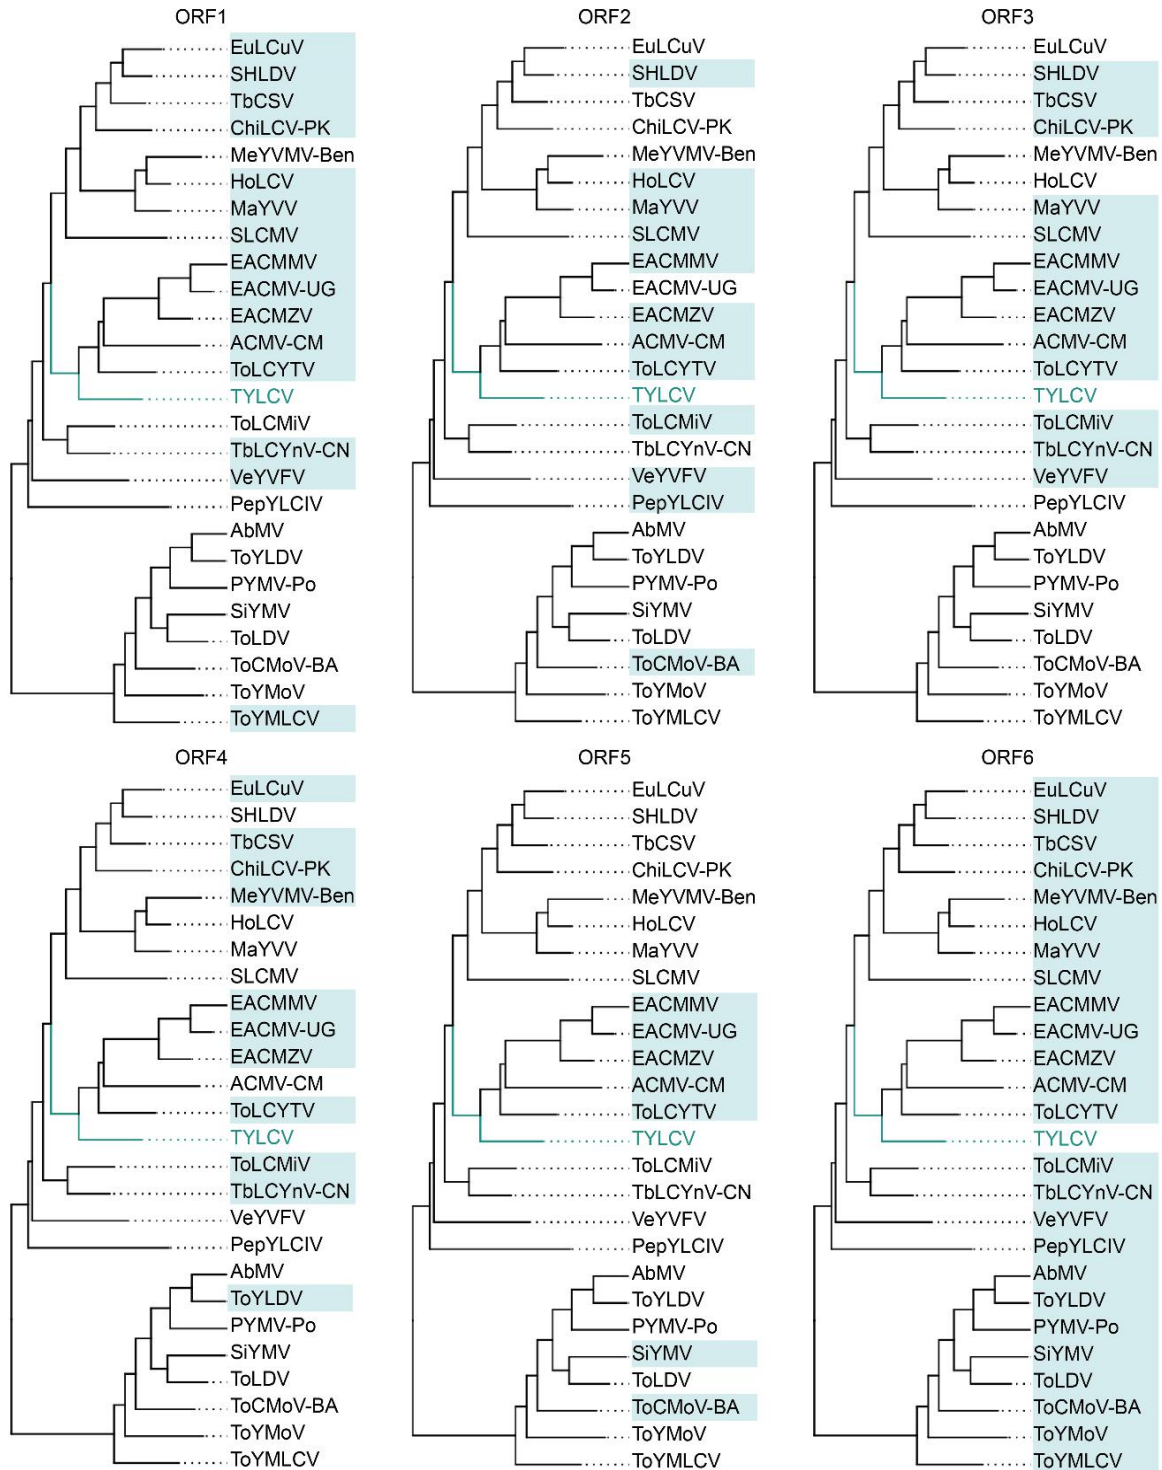

**Supplementary Fig. 5. Distribution of ORF1-6 from TYLCV in the selected subset of mono- and bipartite begomoviruses.** Blue boxes indicate presence of a given ORF (ORF1-6) described in TYLCV (see Supplementary Fig. 4). For a full list of species, see Supplementary Table 6. All sequences were downloaded from GenBank.



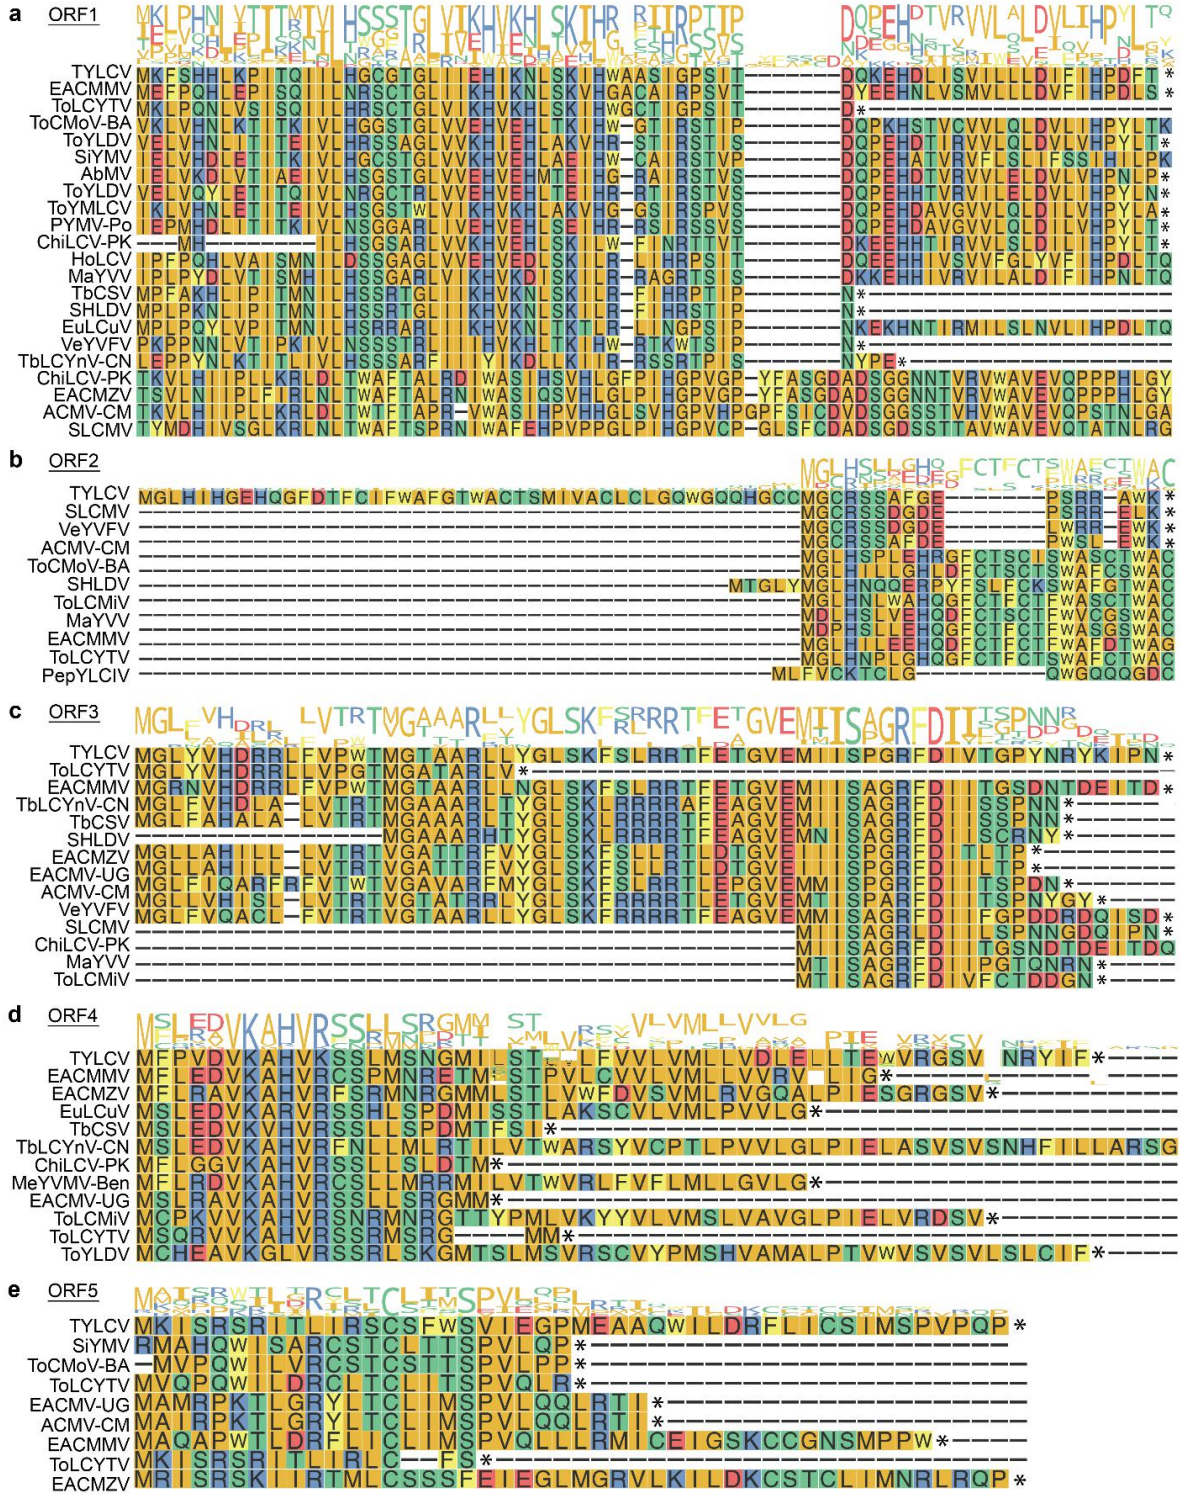

**Supplementary Fig. 6. Multiple sequence alignment of the proteins encoded by ORF1-5 in different begomoviruses.** Multiple sequence alignment of the proteins encoded by ORF1 (a), ORF2 (b), ORF3 (c), ORF4 (d), and ORF5 (e). Multiple sequence alignments were performed by ClustalW. Asterisks indicate stop codons.

ORF6

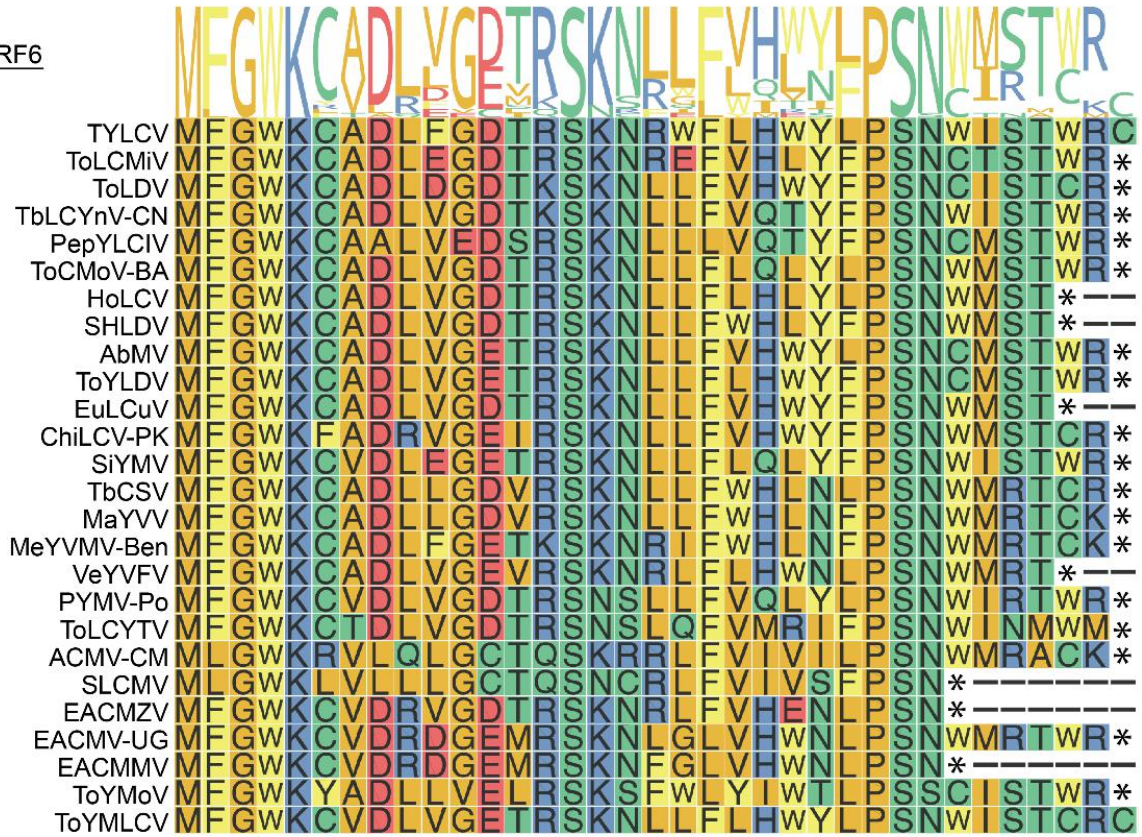

**Supplementary Fig. 7. Multiple sequence alignment of the protein encoded by ORF6 in different begomoviruses.** Multiple sequence alignments were performed by ClustalW. Asterisks indicate stop codons.

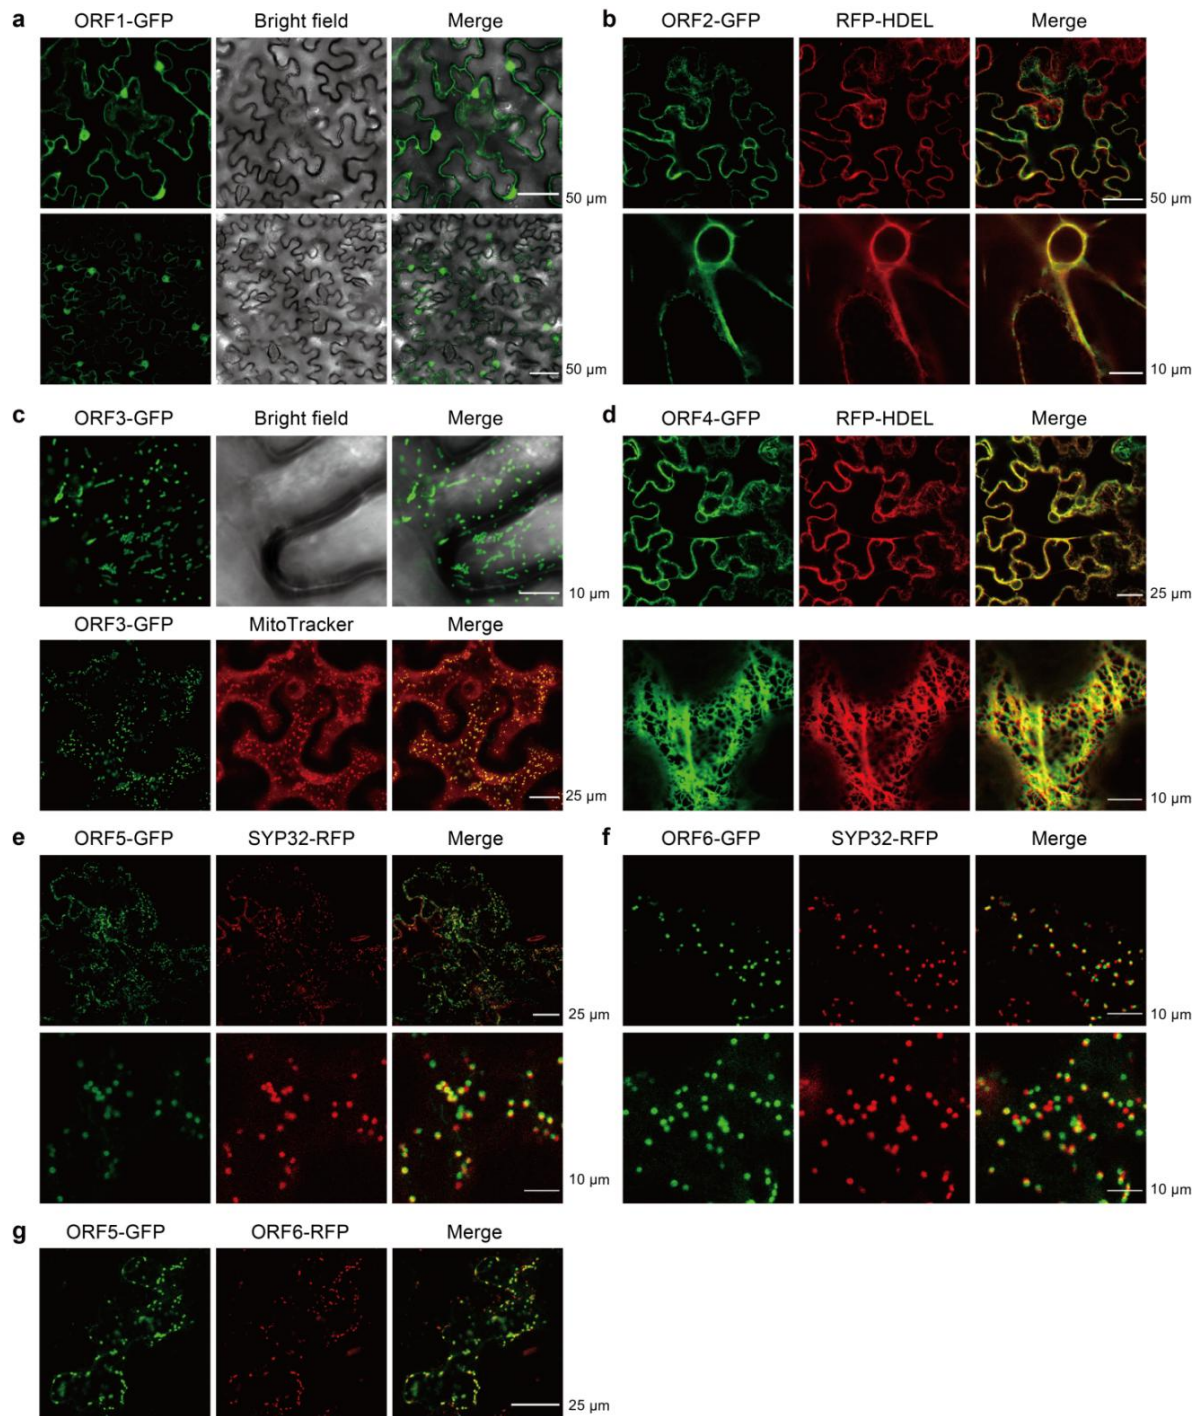

**Supplementary Fig. 8. Additional confocal images showing the subcellular localization of GFP-tagged proteins encoded by the selected additional ORFs from TYLCV (ORF1-6) transiently expressed in *N. benthamiana* leaves (related to Fig. 2).** RFP-HDEL: ER marker; SYP32-RFP: cis-Golgi marker; MitoTracker Red: mitochondrial staining. The size of scale bars is indicated. These experiments were repeated at least three times with similar results; representative images are shown. The TYLCV isolate used in these experiments is TYLCV-Alm.

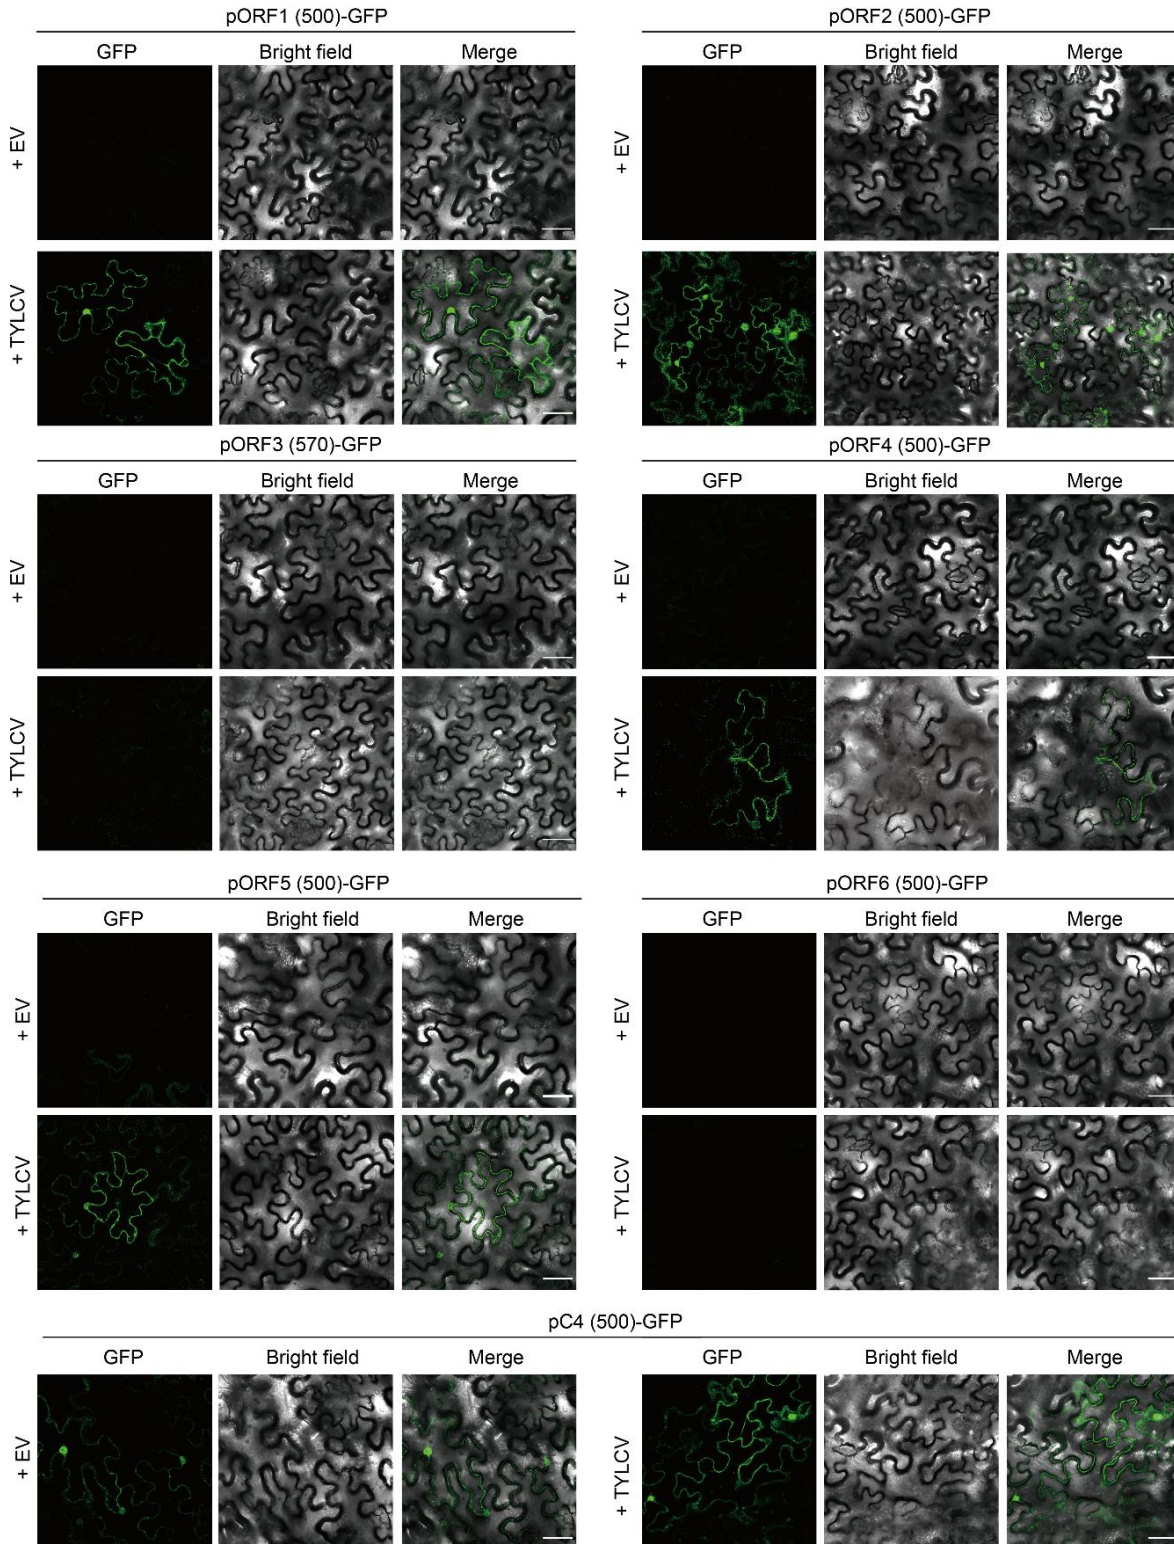

**Supplementary Fig. 9. Promoter activity assay of the sequences upstream of ORF1-6. A.** *tumefaciens* clones harboring pORF-GFP constructs were used to transiently transform *N.*

*benthamiana* leaves in the presence (+TYLCV) or absence (+EV) of TYLCV. EV: empty vector. Scale bar: 25  $\mu$ m. The numbers in brackets indicate the length of the sequenced used, upstream of the ATG of each ORFs, in nt. These experiments were repeated at least three times with similar results; representative images are shown. The TYLCV isolate used in these experiments is TYLCV-Alm.

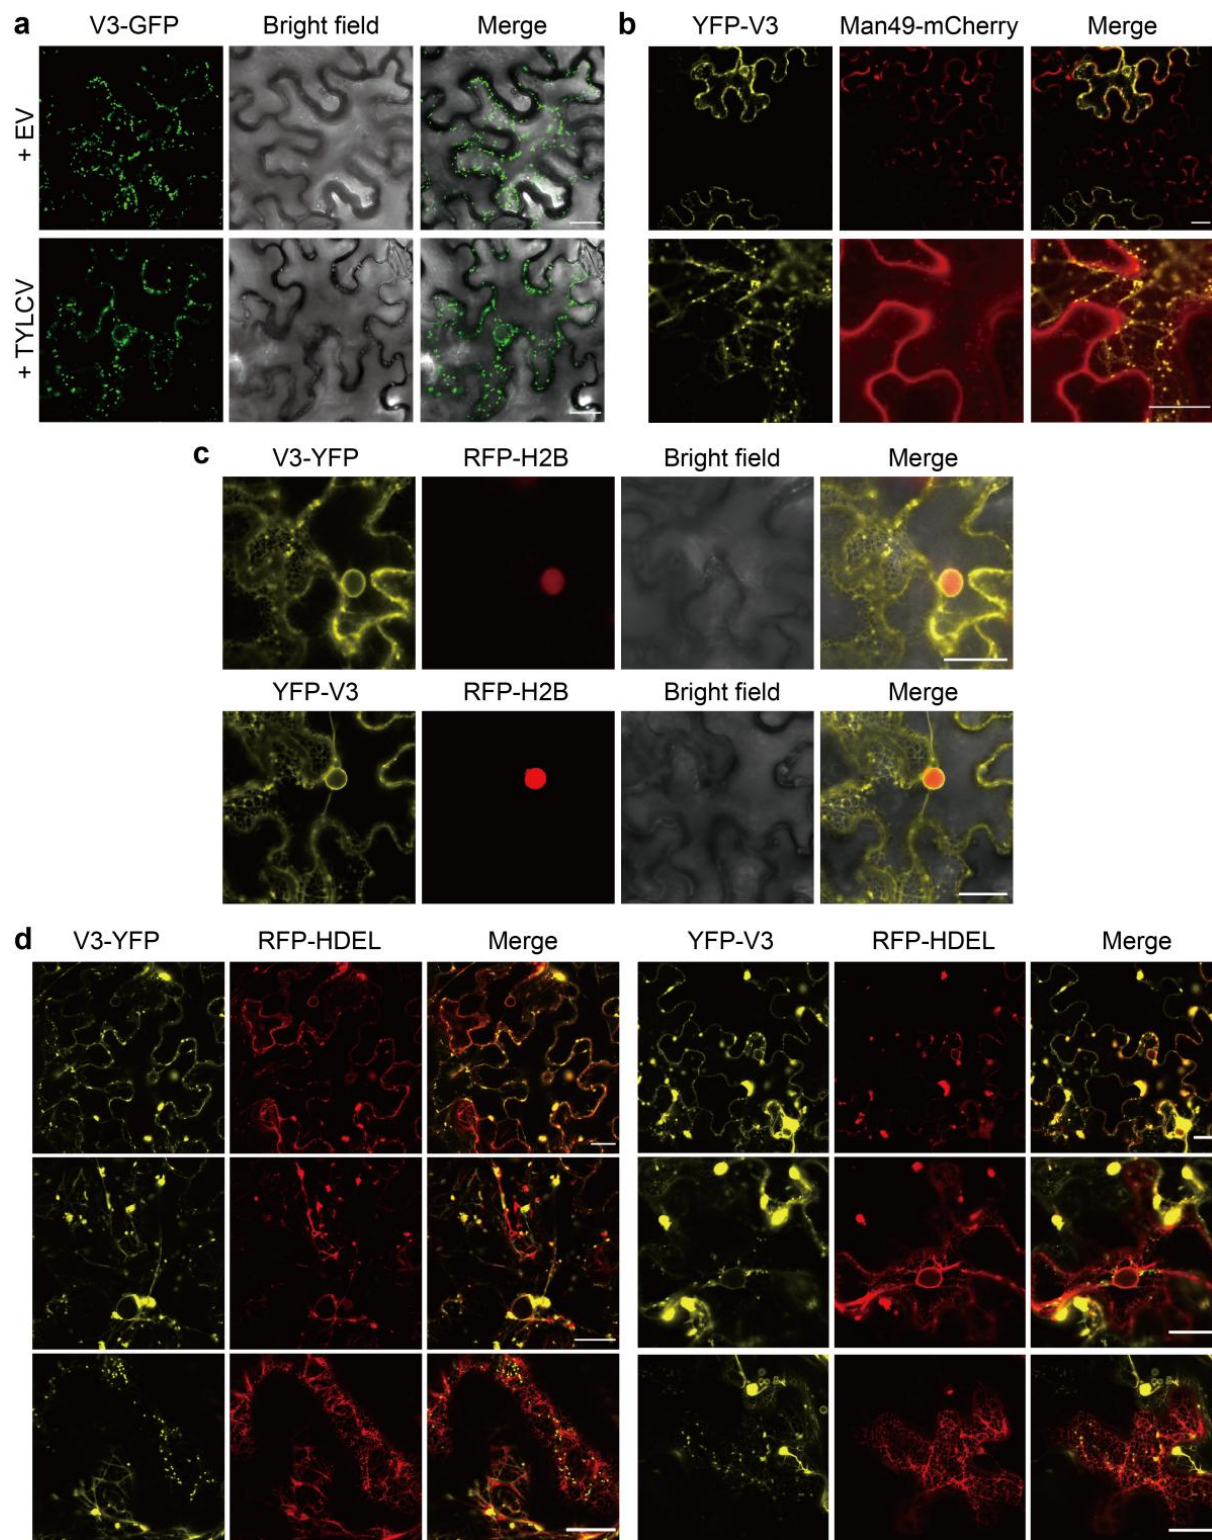

**Supplementary Fig. 10. Additional confocal images showing the subcellular localization of V3 with fluorescent protein tags at its N- or C-terminus. a.** Subcellular localization of V3-GFP in the presence (+TYLCV) or absence (+EV) of TYLCV. EV: empty vector. Scale bar: 25

$\mu\text{m}$ . **b.** Co-localization of YFP-V3 with the cis-Golgi marker Man49-mCherry. Scale bar: 20  $\mu\text{m}$ . **c.** Subcellular localization of V3-YFP or YFP-V3 transiently expressed in RFP-H2B transgenic *N. benthamiana* leaves. Scale bar: 20  $\mu\text{m}$ . **d.** Co-localization of V3-YFP or YFP-V3 with the ER marker RFP-HDEL. Scale bar: 25  $\mu\text{m}$ . **a-d.** These experiments were repeated at least three times with similar results; representative images are shown.

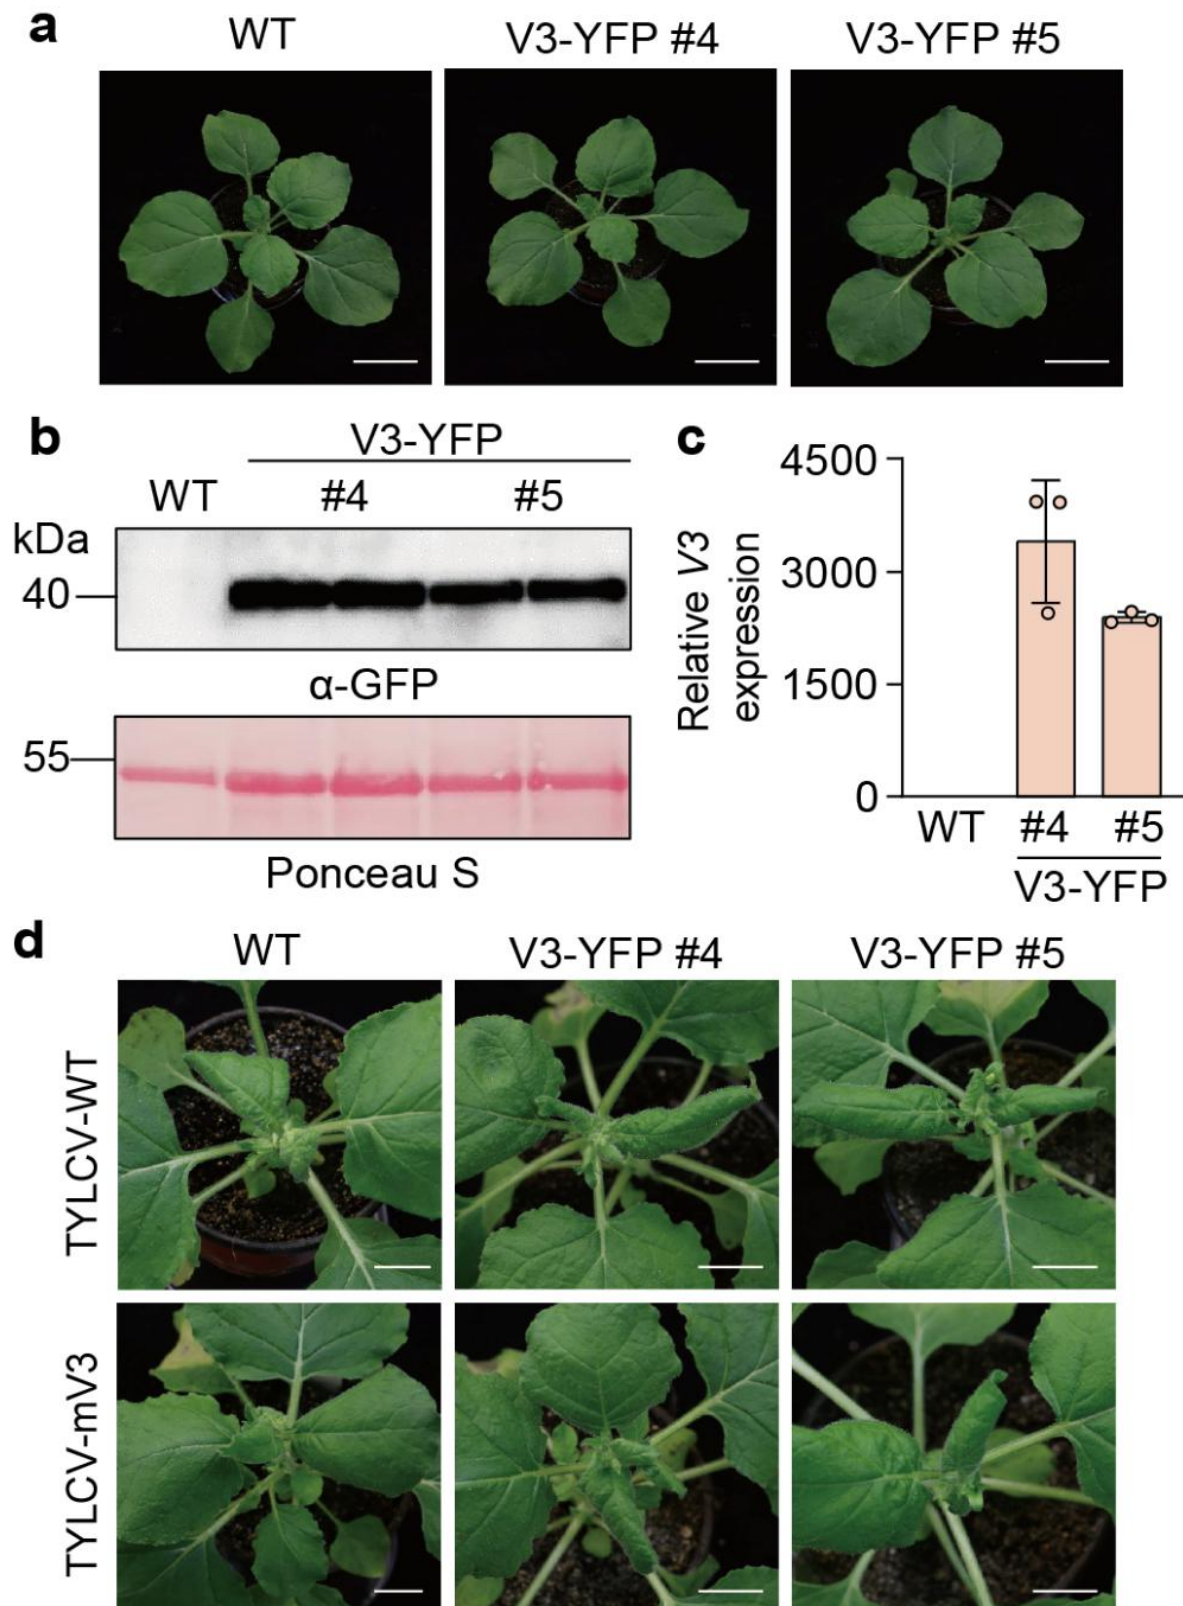

**Supplementary Fig. 11. Characterization of transgenic *N. benthamiana* lines expressing V3.** a. Phenotype of 5-week-old p35S:V3-YFP T1 transgenic *N. benthamiana* lines (#4 and #5)



compared to the wild type (WT). Scale bar: 2 cm. **b.** Western blot showing V3-YFP protein accumulation in the plants in **(a)**. The corresponding Ponceau S staining of the large RuBisCO subunit serves as loading control. This experiment was repeated at least three times independently with similar results. **c.** Relative V3 expression levels in WT and V3-YFP transgenic lines measured by qRT-PCR. Data are the mean of three independent biological replicates. Error bars represent SD. *NbActin2* was used as internal reference. **d.** Symptoms of V3-YFP transgenic *N. benthamiana* plants infected with TYLCV-WT or TYLCV-mV3 at 11 dpi. Scale bar: 2 cm. The original data from all experiments and replicates can be found in the Source data file.

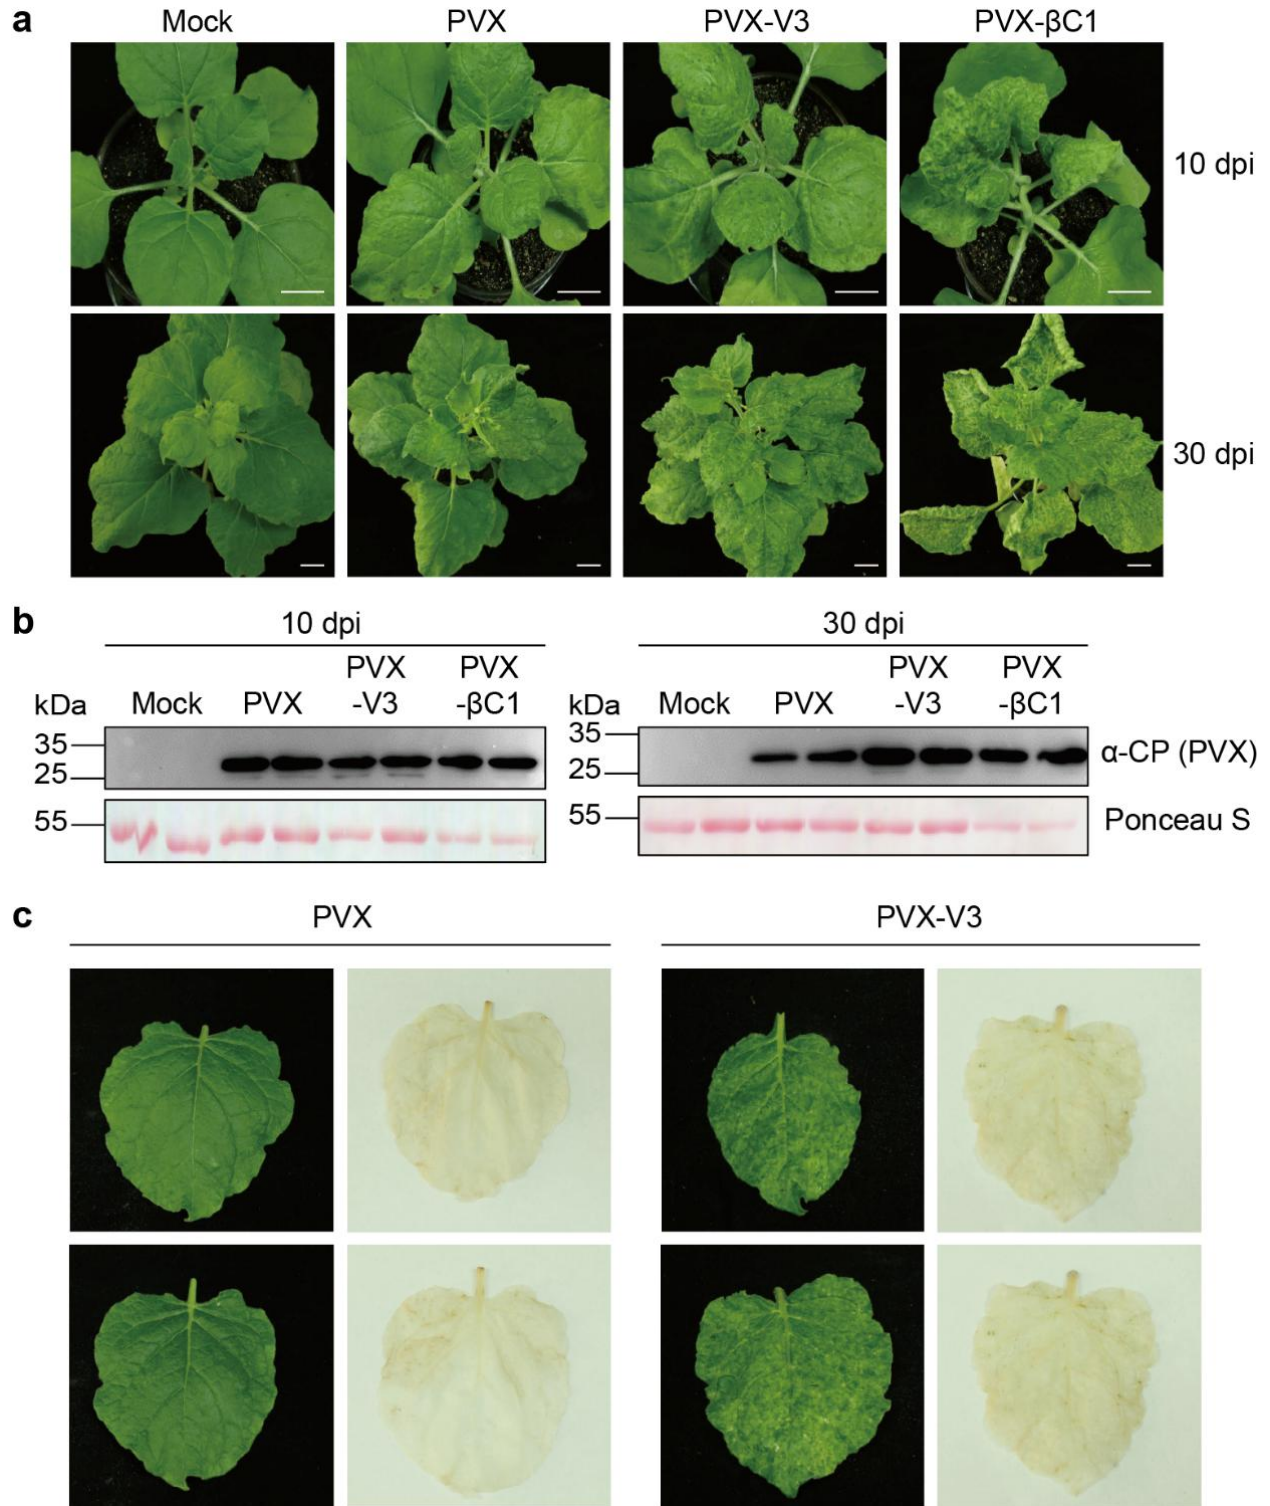

**Supplementary Fig. 12. V3 enhances the pathogenicity of PVX.** **a.** Symptoms of *N. benthamiana* plants infected with PVX, PVX-V3, PVX- $\beta$ C1 (as positive control), or mock-inoculated at 10 dpi (upper panel) or 30 dpi (lower panel). Scale bar: 2 cm. **b.** Western blot showing the accumulation of PVX CP in systemic leaves from (a). The corresponding Ponceau

S staining of the large RuBisCO subunit serves as loading control. This experiment was repeated at least three times independently with similar results. **c.** DAB staining of *N. benthamiana* leaves infiltrated with PVX or PVX-V3. The original data from all experiments and replicates can be found in the Source data file.

## Supplementary Tables

**Supplementary Table 1. Primers used in this work.**

| Primer name  | Sequence (5'-3')                                           | Purpose                          |
|--------------|------------------------------------------------------------|----------------------------------|
| ORF1-F       | CACCATGGGCCTTCACATCCACGG                                   | To generate TOPO-ORF1-NS         |
| ORF1-NS-R    | TTCCACGCCCGTCTCGAAG                                        | To generate TOPO-ORF1-NS         |
| ORF2-F       | CACCATGAAATTTTCTCATCACTTGAAAC                              | To generate TOPO-ORF2-NS         |
| ORF2-NS-R    | GGTAAAGTCTGGATGGATGAA                                      | To generate TOPO-ORF2-NS         |
| ORF3-F       | GGGGACAAGTTTGTACAAAAAAGCAGGCTTCATGGGCCTGTACGTCC<br>ATGA    | To generate pDONR-ORF3-NS        |
| ORF3-NS-R    | GGGGACCACTTTGTACAAGAAAGCTGGGTCATTAGGGATCTTATATC<br>TG      | To generate pDONR-ORF3-NS        |
| ORF4-F       | CACCATGTTCCCCGTGGATGTGAAG                                  | To generate TOPO-ORF4-NS         |
| ORF4-NS-R    | AAAAATATATCGATTTAACAC                                      | To generate TOPO-ORF4-NS         |
| ORF5-F       | CACCATGAAAATATCAAGAAGCAGA                                  | To generate TOPO-ORF5-NS         |
| ORF5-NS-R    | CGGTTGCGGTACTIONGGGCTCAT                                   | To generate TOPO-ORF5-NS         |
| ORF6-F       | CACCATGTTCCGATGGAATGTGCTG                                  | To generate TOPO-ORF6-NS         |
| ORF6-NS-R    | TTTCCTAACATATCCCAATTGT                                     | To generate TOPO-ORF6-NS         |
| SYP32-F      | CACCATGTCGGCAAGGCATGGGCAAT                                 | To generate TOPO-SYP32-NS        |
| SYP32-NS-R   | TGCCACGAAGAAGAGGAAAATCAT                                   | To generate TOPO-SYP32-NS        |
| ORF1pro500-F | GGGGACAAGTTTGTACAAAAAAGCAGGCTTCAGAGGCATGCGTACAT<br>GCCA    | To generate pDONR-<br>pORF1(500) |
| ORF1pro500-R | GGGGACCACTTTGTACAAGAAAGCTGGGTCGTAAGTCCAGTCTTAT<br>GAG      | To generate pDONR-<br>pORF1(500) |
| ORF2pro500-F | GGGGACAAGTTTGTACAAAAAAGCAGGCTTCAACCACGACATCATT<br>CCATTC   | To generate pDONR-<br>pORF2(500) |
| ORF2pro500-R | GGGGACCACTTTGTACAAGAAAGCTGGGTCGCAACAGTTATTGGTG<br>GGC      | To generate pDONR-<br>pORF2(500) |
| ORF3pro570-F | GGGGACAAGTTTGTACAAAAAAGCAGGCTTCACTGGATTAGAGGCAT<br>GCGT    | To generate pDONR-<br>pORF3(570) |
| ORF3pro570-R | GGGGACCACTTTGTACAAGAAAGCTGGGTCCGAAAGCCCAGAATATA<br>CAGAATG | To generate pDONR-<br>pORF3(570) |
| ORF4pro500-F | GGGGACAAGTTTGTACAAAAAAGCAGGCTTCACTACCGGATGGCCG<br>CGCCT    | To generate pDONR-<br>pORF4(500) |
| ORF4pro500-R | GGGGACCACTTTGTACAAGAAAGCTGGGTCCAGGGCTTCGATACATT<br>CTG     | To generate pDONR-<br>pORF4(500) |
| ORF5pro500-F | GGGGACAAGTTTGTACAAAAAAGCAGGCTTCGAATCTGTTACGGAT<br>TTCG     | To generate pDONR-<br>pORF5(500) |
| OR5pro500-R  | GGGGACCACTTTGTACAAGAAAGCTGGGTCCCATCCAGACTTTACCT<br>AA      | To generate pDONR-<br>pORF5(500) |
| ORF6pro500-F | GGGGACAAGTTTGTACAAAAAAGCAGGCTTCTGTACCACGCATCATT<br>ACTG    | To generate pDONR-<br>pORF6(500) |
| ORF6pro500-R | GGGGACCACTTTGTACAAGAAAGCTGGGTCTCAGGCAGCTAAGAGC<br>TCAAC    | To generate pDONR-<br>pORF6(500) |
| C4pro500-F   | GGGGACAAGTTTGTACAAAAAAGCAGGCTTCAGATTCAGGAAATTCA            | To generate pDONR-pC4(500)       |

|                   |                                                          |                                       |
|-------------------|----------------------------------------------------------|---------------------------------------|
|                   | TTTAG                                                    |                                       |
| C4pro500-R        | GGGGACCACTTTGTACAAGAAAGCTGGGTCTCTCGTGGAGTTCTCTG<br>CAAAC | To generate pDONR-pC4(500)            |
| V3-GSPs-R         | GATTACGCCAAGCTTCTCTCTCTAAAGAGGAAGCACTTTCCC               | For 5'RACE                            |
| V3-nGSPs-R        | GATTACGCCAAGCTTGGGGAACCCACATCTCCATGTGC                   | For 5'RACE                            |
| q-25S-rRNA-F      | ATAACCGCATCAGGTCTCCA                                     | For qPCR                              |
| q-25S-rRNA-R      | CCGAAGTTACGGATCCATTT                                     | For qPCR                              |
| q-TYLCV-F         | CCCTCAAAGCTCTATGGCAATCGG                                 | For qPCR                              |
| q-TYLCV-R         | CAGTGACGTCTGTGGAACCCTC                                   | For qPCR                              |
| qV3-F             | ATGTTCCGGATGGAAATGTGCTGA                                 | For qPCR                              |
| qV3-R             | GTTTGCAGAGAACTCCACGAGAA                                  | For qPCR and reverse<br>transcription |
| NbActin2-qPCR-F   | AAAGACCAGCTCATCCGTGGAGAA                                 | For qPCR                              |
| NbActin2-qPCR-R   | TGTGGTTTCATGAATGCCAGCAGC                                 | For qPCR                              |
| IF V3pro833 GFP-F | GCTATGACATGATTACGAATTCGCAGCCACAGTCTAGGTC                 | To generate pCHF3-V3-GFP<br>vector    |
| IF V3pro833 GFP-R | GGATCCCCGGGTACCGAGCTCTCAGGCAGCTAAGAGCTC                  | To generate pCHF3-V3-GFP<br>vector    |
| IF V3pro833 GUS-F | CCAAGCTGGCGCGCCAAGCTTGCAGCCACAGTCTAGGTC                  | To generate pINT121-V3-GUS<br>vector  |
| IF V3pro833 GUS-R | GACTGACCTACCCGGGGATCCTCAGGCAGCTAAGAGCTCAAC               | To generate pINT121-V3-GUS<br>vector  |
| mV3-F             | TTAGCTGCCTGAACGTTCCGGATGGAAATG                           | To generate TYLCV-mV3                 |
| mV3-R             | CCATCCGAACGTTCCAGGCAGCTAAGAGCTCA                         | To generate TYLCV-mV3                 |
| IF-PVX(ClaI)-V3-F | GCACCAGCTAGCATCGAT ATGTTCCGGATGGAAATGTG                  | To generate PVX-V3                    |
| IF-PVX(SalI)-V3-R | GTTTCATCGGCGGTCGAC TTATTTCTAACATATCCCAATTG               | To generate PVX-V3                    |
| 221-V3-F          | GGGGACAAGTTTGTACAAAAAAGCAGGCTTCATGTTCCGGATGGAAAT<br>G    | To generate pDONR-V3                  |
| 221-V3-R          | GGGGACCACTTTGTACAAGAAAGCTGGGTCTTTCCTAACATATCCCA<br>ATTG  | To generate pDONR-V3                  |

**Supplementary Table 2. Selected subset of bipartite begomoviruses (from Supplementary Fig. 1).**

| <b>Species</b>                                    | <b>Isolate</b>                     | <b>Accession number</b>          | <b>Virus Abbrev.</b> |
|---------------------------------------------------|------------------------------------|----------------------------------|----------------------|
| <i>Squash leaf curl Philippines virus</i>         | Philippines/Munoz                  | DNA-A: AB085793; DNA-B: AB085794 | SLCuPV               |
| <i>Pepper yellow leaf curl Indonesia virus</i>    | Indonesia/2005                     | DNA-A: AB267834; DNA-B: AB267835 | PepYLCIV             |
| <i>Tomato mottle Taino virus</i>                  | Cuba                               | DNA-A: AF012300; DNA-B: AF012301 | ToMoTaV              |
| <i>Tomato yellow leaf curl Thailand virus</i>     | Thailand/2/A                       | DNA-A: AF141922; DNA-B: AF141897 | TYLCTHV/A            |
| <i>Tomato rugose mosaic virus</i>                 | Brazil/Uberlandia 1/1996           | DNA-A: AF291705; DNA-B: AF291706 | ToRMV                |
| <i>Squash mild leaf curl virus</i>                | United States/Imperial Valley/1979 | DNA-A: AF421552; DNA-B: AF421553 | SMLCuV               |
| <i>Cotton leaf crumple virus</i>                  | Mexico/Sonora/1991/Arizona         | DNA-A: AF480940; DNA-B: AF480941 | CLCrV/AZ             |
| <i>Tomato chlorotic mottle virus</i>              | Brazil/Seabra 1/1996/Bahia         | DNA-A: AF490004; DNA-B: AF491306 | ToCMoV/BA            |
| <i>Squash leaf curl China virus</i>               | Vietnam/B/China                    | DNA-A: AF509743; DNA-B: AF509742 | SLCCNV/CN            |
| <i>Tomato yellow leaf curl Kanchanaburi virus</i> | Thailand/Kanchanaburi 1/2001       | DNA-A: AF511529; DNA-B: AF511528 | TYLCKaV              |
| <i>Tomato leaf curl Gujarat virus</i>             | India/Varanasi/2001                | DNA-A: AY190290; DNA-B: AY190291 | ToLCGUV              |
| <i>Tomato yellow margin leaf curl virus</i>       | Venezuela/Merida/57                | DNA-A: AY508993; DNA-B: AY508994 | ToYMLCV              |
| <i>Tomato mild yellow leaf curl Aragua virus</i>  | Venezuela/10/2003                  | DNA-A: AY927277; DNA-B: EF547938 | ToMYLCAV             |
| <i>Tomato yellow spot virus</i>                   | Brazil/Bicas 2/1999                | DNA-A: DQ336350; DNA-B: DQ336351 | ToYSV                |
| <i>Tomato golden mottle virus</i>                 | Mexico/San Luiz Potosi/2005        | DNA-A: DQ520943; DNA-B: DQ406674 | ToGMoV               |
| <i>Tomato yellow vein streak virus</i>            | Brazil/Potato/1983                 | DNA-A: EF417915; DNA-B: EF417916 | ToYVSV               |
| <i>Tomato leaf curl Hsinchu virus</i>             | China/Hainan/Ramie/2007            | DNA-A: EU596959; DNA-B: EU596960 | ToLCHsV              |
| <i>Tomato mild mosaic virus</i>                   | Brazil/Paty do Alferes 58/2005     | DNA-A: EU710752; DNA-B: EU710753 | ToMMV                |
| <i>Tomato common mosaic virus</i>                 | Brazil/Coimbra 22/2007             | DNA-A: EU710754; DNA-B: EU710755 | ToCmMV               |
| <i>Tomato yellow leaf distortion virus</i>        | Cuba/5E17/2007                     | DNA-A: FJ174698; DNA-B: FJ999999 | ToYLDV               |
| <i>Tobacco yellow crinkle virus</i>               | Cuba/2007                          | DNA-A: FJ213931; DNA-B: HQ896204 | TbYCV                |
| <i>Tomato chlorotic leaf</i>                      | Venezuela/Zulia/2004               | DNA-A: HQ201952; DNA-B: HQ201953 | ToCILDV              |

|                                               |                                    |                                  |            |
|-----------------------------------------------|------------------------------------|----------------------------------|------------|
| <i>distortion virus</i>                       |                                    |                                  |            |
| <i>Tomato golden vein virus</i>               | Brazil/Ita1220/2003                | DNA-A: JF803254; DNA-B: JF803265 | TGVV       |
| <i>Tomato rugose yellow leaf curl virus</i>   | Uruguay/Salto Grande/U2/2009       | DNA-A: JN381819; DNA-B: JN381814 | TRYLCV     |
| <i>Tomato dwarf leaf virus</i>                | Argentina/Pichanal 397/2008        | DNA-A: JN564749; DNA-B: JN564750 | ToDfLV     |
| <i>Tomato mottle wrinkle virus</i>            | Argentina-Pichanal_400-2008        | DNA-A: JQ714137; DNA-B: JQ714138 | ToMoWV     |
| <i>Tomato golden mosaic virus</i>             | Brazil/Common/1984                 | DNA-A: K02029; DNA-B: K02030     | TGMV       |
| <i>Tomato yellow mottle virus</i>             | Costa Rica/2003                    | DNA-A: KC176780; DNA-B: KC176781 | ToYMoV     |
| <i>Tomato mottle leaf curl virus</i>          | Brazil/Jaiba 13/2008               | DNA-A: KC706615; DNA-B: JF803264 | ToMoLCV    |
| <i>Cotton chlorotic spot virus</i>            | Brazil/CampinaGrandeB012/2009      | DNA-A: KF358470; DNA-B: KF358471 | CoChSpV    |
| <i>Tomato chlorotic mottle Guyane virus</i>   | French Guyana-Mon2-GF455-2009      | DNA-A: KR263181; DNA-B: KR263172 | ToCMoGV    |
| <i>Cotton yellow mosaic virus</i>             | Benin-Gos_San2-2014                | DNA-A: KU683748; DNA-B: KU683750 | CYMV       |
| <i>Tobacco leaf curl Cuba virus</i>           | Cuba/VC/2015                       | DNA-A: KX011471; DNA-B: KX011472 | TbLCCUV    |
| <i>Pepper yellow leaf curl Thailand virus</i> | Thailand-WF_SPN_Pep-2015           | DNA-A: KX943290; DNA-B: KX943291 | PepYLCTHV  |
| <i>Tomato mottle virus</i>                    | United States/Florida/1989         | DNA-A: L14460; DNA-B: L14461     | ToMoV      |
| <i>Squash leaf curl virus</i>                 | United States/Imperial Valley/1979 | DNA-A: M38183; DNA-B: M38182     | SLCuV      |
| <i>Pepper golden mosaic virus</i>             | Mexico/Tamaulipas/Tamaulipas       | DNA-A: U57457; DNA-B: AF499442   | PepGMV/Tam |
| <i>Pepper huasteco yellow vein virus</i>      | Mexico/Tamaulipas                  | DNA-A: X70418; DNA-B: X70419     | PHYVV      |
| <i>Tomato mosaic Havana virus</i>             | Cuba/Quivican                      | DNA-A: Y14874; DNA-B: Y14875     | ToMHaV     |
| <i>Bean golden yellow mosaic virus</i>        | Dominican Republic/1987            | DNA-A: L01635; DNA-B: L01636     | BGYMV      |

**Supplementary Table 3. Selected subset of curtoviruses (from Supplementary Fig. 2).**

| <b>Species</b>                        | <b>Isolate</b>                                            | <b>Accession number</b> | <b>Virus Abbrev.</b> |
|---------------------------------------|-----------------------------------------------------------|-------------------------|----------------------|
| <i>Beet curly top virus</i>           | United States/CA/Logan/1985/California Logan              | M24597                  | BCTV/CA/Logan        |
| <i>Beet curly top virus</i>           | Mexico/Mild/2006/Mild                                     | EU193175                | BCTV/Mld             |
| <i>Beet curly top virus</i>           | United States/Severe/Cfh/Severe                           | U02311                  | BCTV/Svr             |
| <i>Beet curly top virus</i>           | United States/New Mexico/Severe/Pepper/2001/Severe pepper | FJ545686                | BCTV/SvrPep          |
| <i>Beet curly top virus</i>           | United States/Colorado/1995/Colorado                      | JN817383                | BCTV/CO              |
| <i>Beet curly top virus</i>           | United States/Mild/Worland/Worland                        | U56975                  | BCTV/Wor             |
| <i>Beet curly top virus</i>           | United States/Spinach 3/1996/Spinach curly top            | AY548948                | BCTV/ SpCT           |
| <i>Beet curly top virus</i>           | United States/New Mexico/Pepper/2005/Pepper curly top     | EF501977                | BCTV/ PeCT           |
| <i>Beet curly top virus</i>           | United States/New Mexico/Pepper/2007/Pepper yellow dwarf  | EU921828                | BCTV/ PeYD           |
| <i>Horseradish curly top virus</i>    | United States/Salinas/1988                                | U49907                  | HCTV                 |
| <i>Spinach severe curly top virus</i> | United States/Arizona/Spinach 0910/2009                   | GU734126                | SpSCTV               |



**Supplementary Table 4. Selected subset of mastreviruses (from Supplementary Fig. 3).**

| Species                                   | Isolate                                                | Accession number | Virus Abbrev. |
|-------------------------------------------|--------------------------------------------------------|------------------|---------------|
| <i>Chickpea chlorosis Australia virus</i> | Australia/2614/2010]                                   | JN989422         | CpCAV         |
| <i>Chickpea chlorosis virus</i>           | Australia/3455C/2002/A                                 | GU256530         | CpCV/A        |
| <i>Chickpea redleaf virus</i>             | Australia/Queensland 22/2003                           | GU256532         | CpRLV         |
| <i>Chickpea yellow dwarf virus</i>        | Pakistan/PK37/                                         | KM377674         | CpYDV         |
| <i>Chickpea yellows virus</i>             | Australia/3489B/2002                                   | JN989439         | CpYV          |
| <i>Eragrostis minor streak virus</i>      | Namibia/Caprivi/g450/2009                              | JF508490         | EMSV          |
| <i>Eragrostis streak virus</i>            | Zimbabwe/Guruwe 186/2007                               | EU244915         | ESV           |
| <i>Maize streak dwarfing virus</i>        | ET-Adama Zuria-MV1-16                                  | MK329300         | MSDV          |
| <i>Maize streak Reunion virus</i>         | La Reunion/St Pierre/PR52/2009                         | JQ624879         | MSRV          |
| <i>Maize streak virus</i>                 | South Africa/A                                         | Y00514           | MSV/A         |
| <i>Maize streak virus</i>                 | South Africa/Worester/Plaas Staal B/g27b/2006/B        | EU628597         | MSV/B         |
| <i>Maize streak virus</i>                 | South Africa/Mt Edgecomb/Setaria/1988/C                | AF007881         | MSV/C         |
| <i>Maize streak virus</i>                 | South Africa/Rawsonville/1998/D                        | AF329889         | MSV/D         |
| <i>Maize streak virus</i>                 | South Africa/Mitchelle Park/Natal A/g125/Dig/2006/E    | EU628626         | MSV/E         |
| <i>Maize streak virus</i>                 | Nigeria/IITA B/g88/Urochloa/2007/F                     | EU628629         | MSV/F         |
| <i>Maize streak virus</i>                 | Mali/Mic25/Digitaria/1987/G                            | EU628631         | MSV/G         |
| <i>Maize streak virus</i>                 | Nigeria/Lagbaka/g79/Setaria/2007/H                     | EU628638         | MSV/H         |
| <i>Maize streak virus</i>                 | South Africa/New Germany/Natal/A/g217/Digitaria/2007/I | EU628639         | MSV/I         |
| <i>Maize streak virus</i>                 | Zimbabwe/Mic24K/Pennisetum/1987/J                      | EU628641         | MSV/J         |
| <i>Maize streak virus</i>                 | Uganda/Busia 4/Eustachys/2005/K                        | EU628643         | MSV/K         |
| <i>Oat dwarf virus</i>                    | Germany/Saxena 25/2006                                 | AM296025         | ODV           |
| <i>Panicum streak virus</i>               | South Africa/Karino/1989/A                             | L39638           | PanSV/A       |
| <i>Panicum streak virus</i>               | Kenya/1990/B                                           | X60168           | PanSV/B       |
| <i>Panicum streak virus</i>               | Zimbabwe/Guruwe 169/Urochloa/2006/C                    | EU224264         | PanSV/C       |
| <i>Sugarcane chlorotic streak virus</i>   | Nigeria/Sc-10/SR/1/2015                                | KX787914         | SCSV          |
| <i>Sugarcane streak Egypt virus</i>       | Egypt/Aswan                                            | AF037752         | SSEV          |
| <i>Sugarcane streak virus</i>             | South Africa/Natal/A                                   | M82918           | SSV/A         |
| <i>Sugarcane streak virus</i>             | La Reunion/St Pierre/Pie/R5/Cenchrus/2006/B            | EU244914         | SSV/B         |
| <i>Sweet potato symptomless virus 1</i>   | Kenya/Q44429/2005                                      | KY565231         | SpSV/1        |
| <i>Tobacco yellow dwarf virus</i>         | Australia/1992                                         | M81103           | TbYDV         |
| <i>Wheat dwarf India virus</i>            | India/2010                                             | JQ361910         | WDIV          |
| <i>Wheat dwarf virus</i>                  | Turkey/barley/A                                        | AJ783960         | WDV/A         |
| <i>Wheat dwarf virus</i>                  | Iran/2008/B                                            | FJ620684         | WDV/B         |
| <i>Wheat dwarf virus</i>                  | Hungary/Kompolt10/1/2010/C                             | JQ647455         | WDV/C         |

**Supplementary Table 5. Selected subset of monopartite begomoviruses causing tomato yellow leaf curl disease (from Supplementary Fig. 4).**

| Species                                        | Isolate                                   | Accession number   | Virus Abbrev. |
|------------------------------------------------|-------------------------------------------|--------------------|---------------|
| <i>Tomato yellow leaf curl virus</i>           | Spain/Almeria/Pepper/1999                 | AJ489258           | TYLCV         |
| <i>Tomato yellow leaf curl virus</i>           | Iran/Genaveh 29/2006/Boushehr             | GU076454           | TYLCV/Bou     |
| <i>Tomato yellow leaf curl virus</i>           | Iran/Iranshahr/1998/Iran                  | AJ132711           | TYLCV/IR      |
| <i>Tomato yellow leaf curl virus</i>           | Iran/Kahnooj/2007/Kahnoo                  | EU635776           | TYLCV/Kah     |
| <i>Tomato yellow leaf curl virus</i>           | Iran/Hormozgan 32/2006/Kerman             | GU076442           | TYLCV/Ker     |
| <i>Tomato yellow leaf curl virus</i>           | Israel/1993/Mild                          | X76319             | TYLCV/Mld     |
| <i>Tomato yellow leaf curl China virus</i>     | China/Guangxi/Honghe                      | DNA-A:<br>AF311734 | TYLCCNV/HH    |
| <i>Tomato yellow leaf curl China virus</i>     | China/Yunnan 10/Tobacco/2000/Baoshan      | AJ319675           | TYLCCNV/BS1   |
| <i>Tomato yellow leaf curl China virus</i>     | China/Yunnan 25/Tomato/2000               | DNA-A:<br>AJ457985 | TYLCCNV       |
| <i>Tomato yellow leaf curl China virus</i>     | China/Yunnan 278/Malvastrum/2007/Baoshan3 | DNA-A:<br>AM980509 | TYLCCNV/BS3   |
| <i>Tomato yellow leaf curl China virus</i>     | China/Yunnan/Bean/2004/Bean               | DQ256460           | TYLCCNV/Bea   |
| <i>Tomato yellow leaf curl China virus</i>     | China/Yunnan 5/Tobacco/1999/Dali          | DNA-A:<br>AJ319674 | TYLCCNV/DL    |
| <i>Tomato yellow leaf curl China virus</i>     | China/Yunnan 72/ Datura/2005/Datura       | EF011559           | TYLCCNV/Dat   |
| <i>Tomato yellow leaf curl Thailand virus</i>  | Thailand/Chiang Mai/B                     | DNA-A:<br>AY514630 | TYLCTHV/B     |
| <i>Tomato yellow leaf curl Thailand virus</i>  | China/Yunnan 72/2002/C                    | DNA-A:<br>AJ495812 | TYLCTHV/C     |
| <i>Tomato yellow leaf curl Thailand virus</i>  | Myanmar/Yangon/1999/D                     | DNA-A:<br>AF206674 | TYLCTHV/D     |
| <i>Tomato yellow leaf curl Thailand virus</i>  | Thailand/Sakon Nakhon/E                   | DNA-A:<br>AY514632 | TYLCTHV/E     |
| <i>Tomato yellow leaf curl Guangdong virus</i> | China/Guangzhou 3/2003                    | DNA-A:<br>AY602166 | TYLCGdV       |
| <i>Tomato yellow leaf curl Yunnan virus</i>    | China-YN2013-2011                         | DNA-A:<br>KC686705 | TYLCYnV       |
| <i>Tomato yellow leaf curl Mali virus</i>      | Burkina Faso/Tom141/2013                  | LM651400           | TYLCMLV       |
| <i>tomato yellow leaf curl Mali virus</i>      | Ethiopia/Melkassa/2005/Ethiopia           | DNA-A:<br>DQ358913 | TYLCMLV/ET    |
| <i>Tomato yellow leaf curl Mali virus</i>      | Mali/2003/Mali                            | AY502934           | TYLCMLV/ML    |
| <i>Tomato yellow leaf curl Sardinia virus</i>  | Italy/Sardinia/1988                       | X61153             | TYLCSaV       |
| <i>Tomato yellow leaf curl Indonesia virus</i> | Indonesia/Lembang/2005                    | DNA-A:<br>AF189018 | TYLCIDV       |

**Supplementary Table 6. Selected subset of monopartite and bipartite begomoviruses (from Supplementary Fig. 5).**

| Species                                           | Isolate                        | Accession number                    | Virus Abbrev. |
|---------------------------------------------------|--------------------------------|-------------------------------------|---------------|
| <i>Pepper yellow leaf curl Indonesia virus</i>    | Indonesia/2005                 | DNA-A: AB267834;<br>DNA-B: AB267835 | PepYLCIV      |
| <i>African cassava mosaic virus</i>               | Cameroon                       | AF112352                            | ACMV/CM       |
| <i>East African cassava mosaic virus</i>          | Uganda/Severe 2/1997/Uganda    | DNA-A: AF126806;<br>DNA-B: AF126807 | EACMV/UG      |
| <i>Chilli leaf curl virus</i>                     | Pakistan/Multan/1998/Pakistan  | DNA-A: AF336806                     | ChiLCV/PK     |
| <i>East African cassava mosaic Zanzibar virus</i> | Tanzania/Uguja/1998            | DNA-A: AF422174;<br>DNA-B: AF422175 | EACMZV        |
| <i>Tomato chlorotic mottle virus</i>              | Brazil/Seabra 1/1996/Bahia     | DNA-A: AF490004;<br>DNA-B: AF491306 | ToCMoV/BA     |
| <i>East African cassava mosaic Malawi virus</i>   | Malawi/K/1996                  | DNA-A: AJ006460                     | EACMMV        |
| <i>Tobacco curly shoot virus</i>                  | isolate Y35                    | AJ420318                            | TbCSV         |
| <i>Malvastrum yellow vein virus</i>               | China/Yunnan 47/2001           | AJ457824                            | MaYVV         |
| <i>Tomato yellow leaf curl virus</i>              | Spain/Almeria/Pepper/1999      | AJ489258                            | TYLCV         |
| <i>Tobacco leaf curl Yunnan virus</i>             | China/Yunnan 136/2002/China    | AJ512761                            | TbLCYnV/CN    |
| <i>Euphorbia leaf curl virus</i>                  | China/Guangxi 35/2002          | DNA-A: AJ558121                     | EuLCuV        |
| <i>Sri Lankan cassava mosaic virus</i>            | India/Adivaram/2003/India      | DNA-A: AJ579307                     | SLCMV/IN      |
| <i>Tomato leaf curl Mayotte virus</i>             | Mayotte/Kahani/2003            | AJ865340                            | ToLCYTV       |
| <i>Sida yellow mosaic virus</i>                   | Brazil/Vicosa 2/1999           | DNA-A: AY090558                     | SiYMV         |
| <i>Tomato yellow margin leaf curl virus</i>       | Venezuela/Merida/57            | DNA-A: AY508993;<br>DNA-B: AY508994 | ToYMLCV       |
| <i>Potato yellow mosaic virus</i>                 | Venezuela/1991/Potato          | DNA-A: D00940; DNA-B: D00941        | PYMV/Po       |
| <i>Mesta yellow vein mosaic virus</i>             | Barackpore                     | EF373060                            | MeYVMV/Ben    |
| <i>Tomato leaf curl Mindanao virus</i>            | Philippines/Mindanao P162/2007 | EU487046                            | ToLCMiV       |
| <i>Tomato leaf distortion virus</i>               | Brazil/Paty do Alferes 4/2005  | DNA-A: EU710749                     | ToLDV         |
| <i>Tomato yellow leaf distortion virus</i>        | Cuba/5E17/2007                 | DNA-A: FJ174698;<br>DNA-B: FJ999999 | ToYLDV        |
| <i>Sunn hemp leaf distortion virus</i>            | India/Barrackpore 1/2008       | DNA-A: FJ455449                     | SHLDV         |
| <i>Hollyhock leaf curl virus</i>                  | Pakistan/Faisalabad/20/4/06    | FR772082                            | HoLCV         |
| <i>Vernonia yellow vein Fujian virus</i>          | CN-Fj-09                       | JF265670                            | VeYVFV        |
| <i>Tomato yellow mottle virus</i>                 | Costa Rica/2003                | DNA-A: KC176780;<br>DNA-B: KC176781 | ToYMoV        |
| <i>Abutilon mosaic virus</i>                      | Germany                        | DNA-A: X15983; DNA-B: X15984        | AbMV          |
